# Supplementary material for: Cryo-EM structures of Aβ40 filaments from the leptomeninges of individuals with Alzheimer’s disease and cerebral amyloid angiopathy
Source: PubMed Central journal article supplement (PMC10694933; doi:10.1186/s40478-023-01694-8), 2023-12-04
Supplement: 40478_2023_1694_MOESM2_ESM.pdf [file 40478_2023_1694_MOESM2_ESM.pdf]

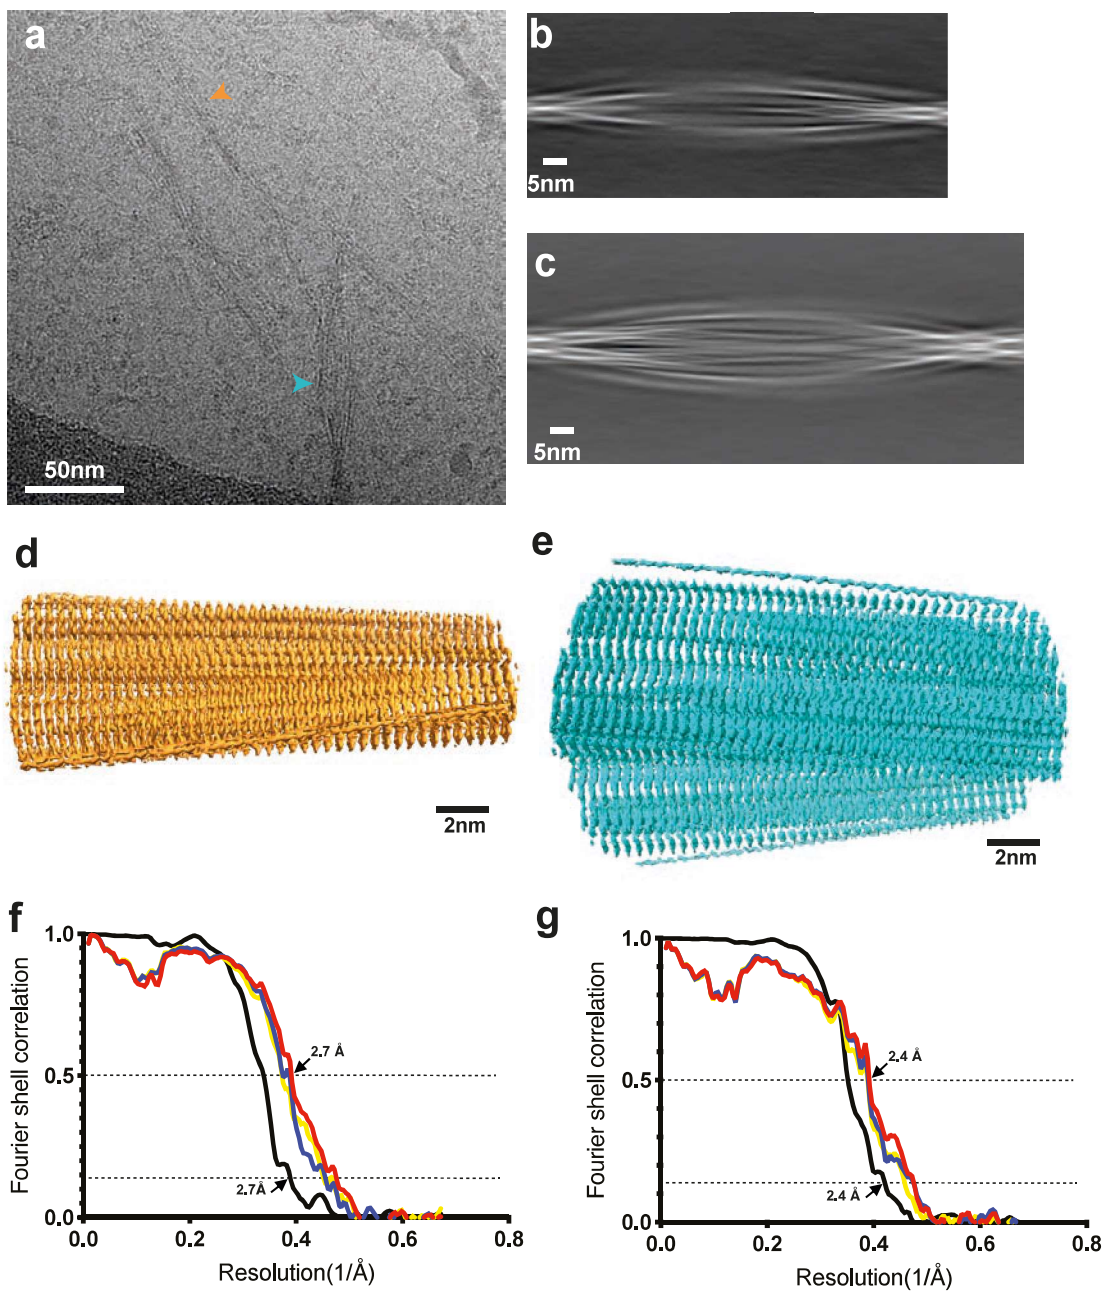

Figure S1

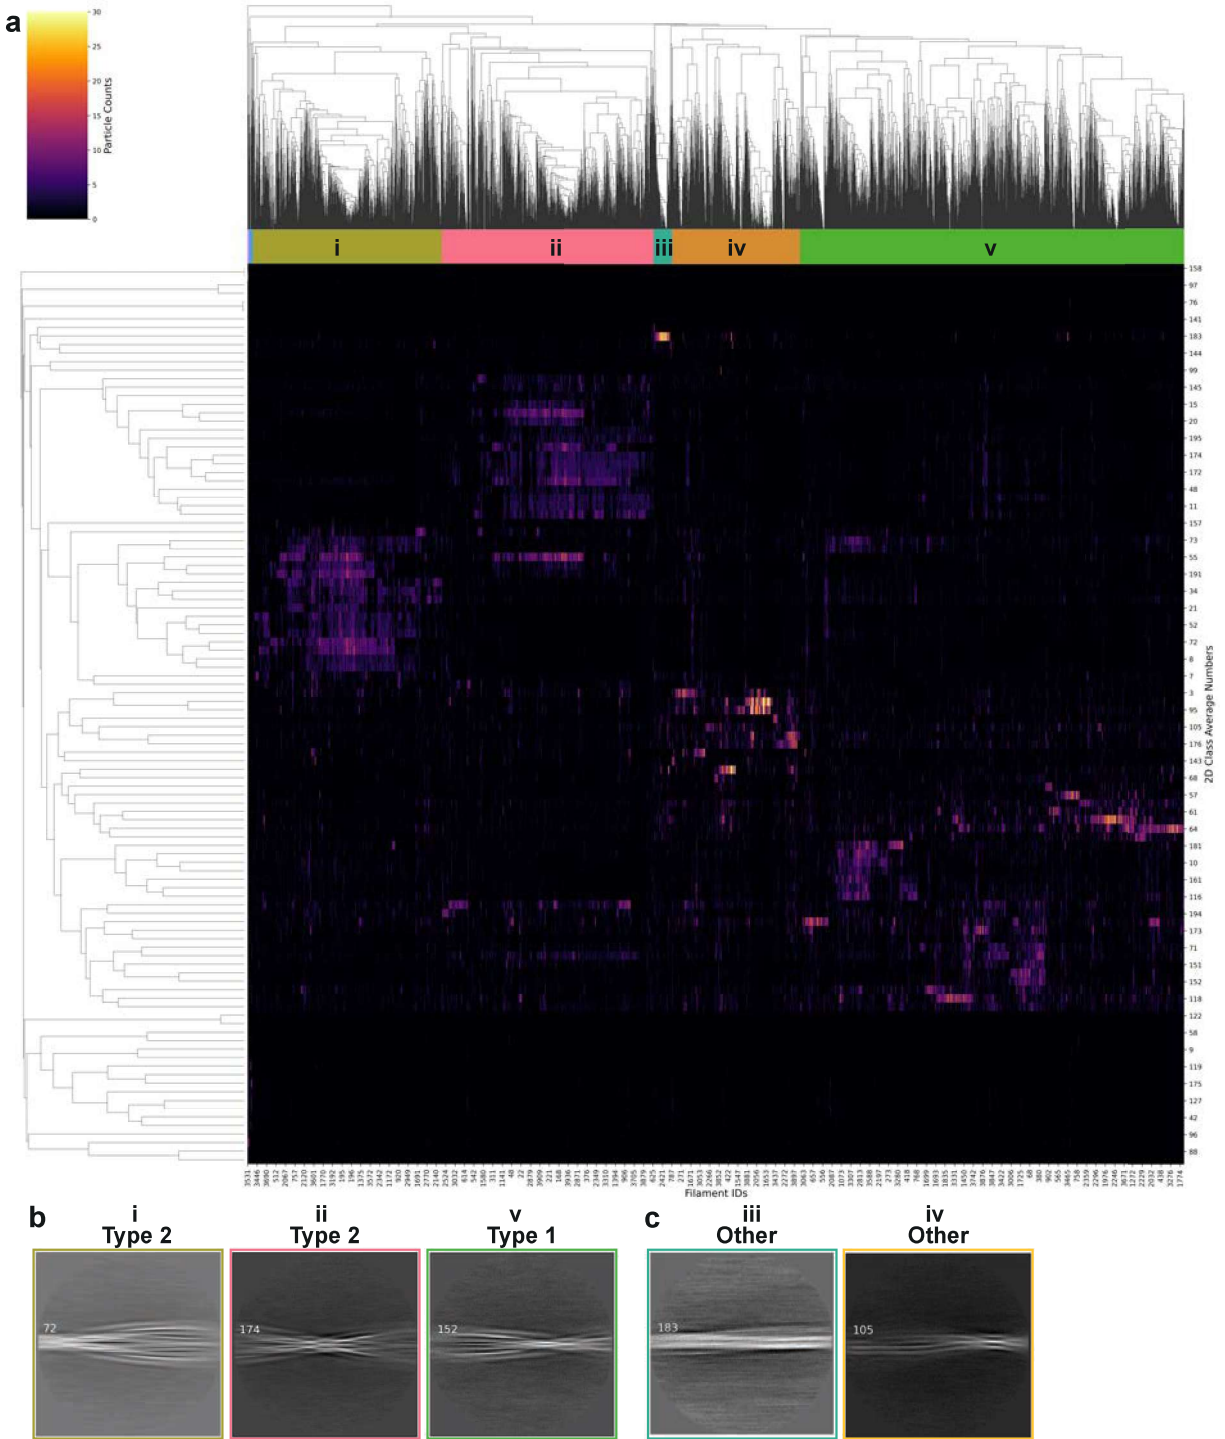

Figure S2

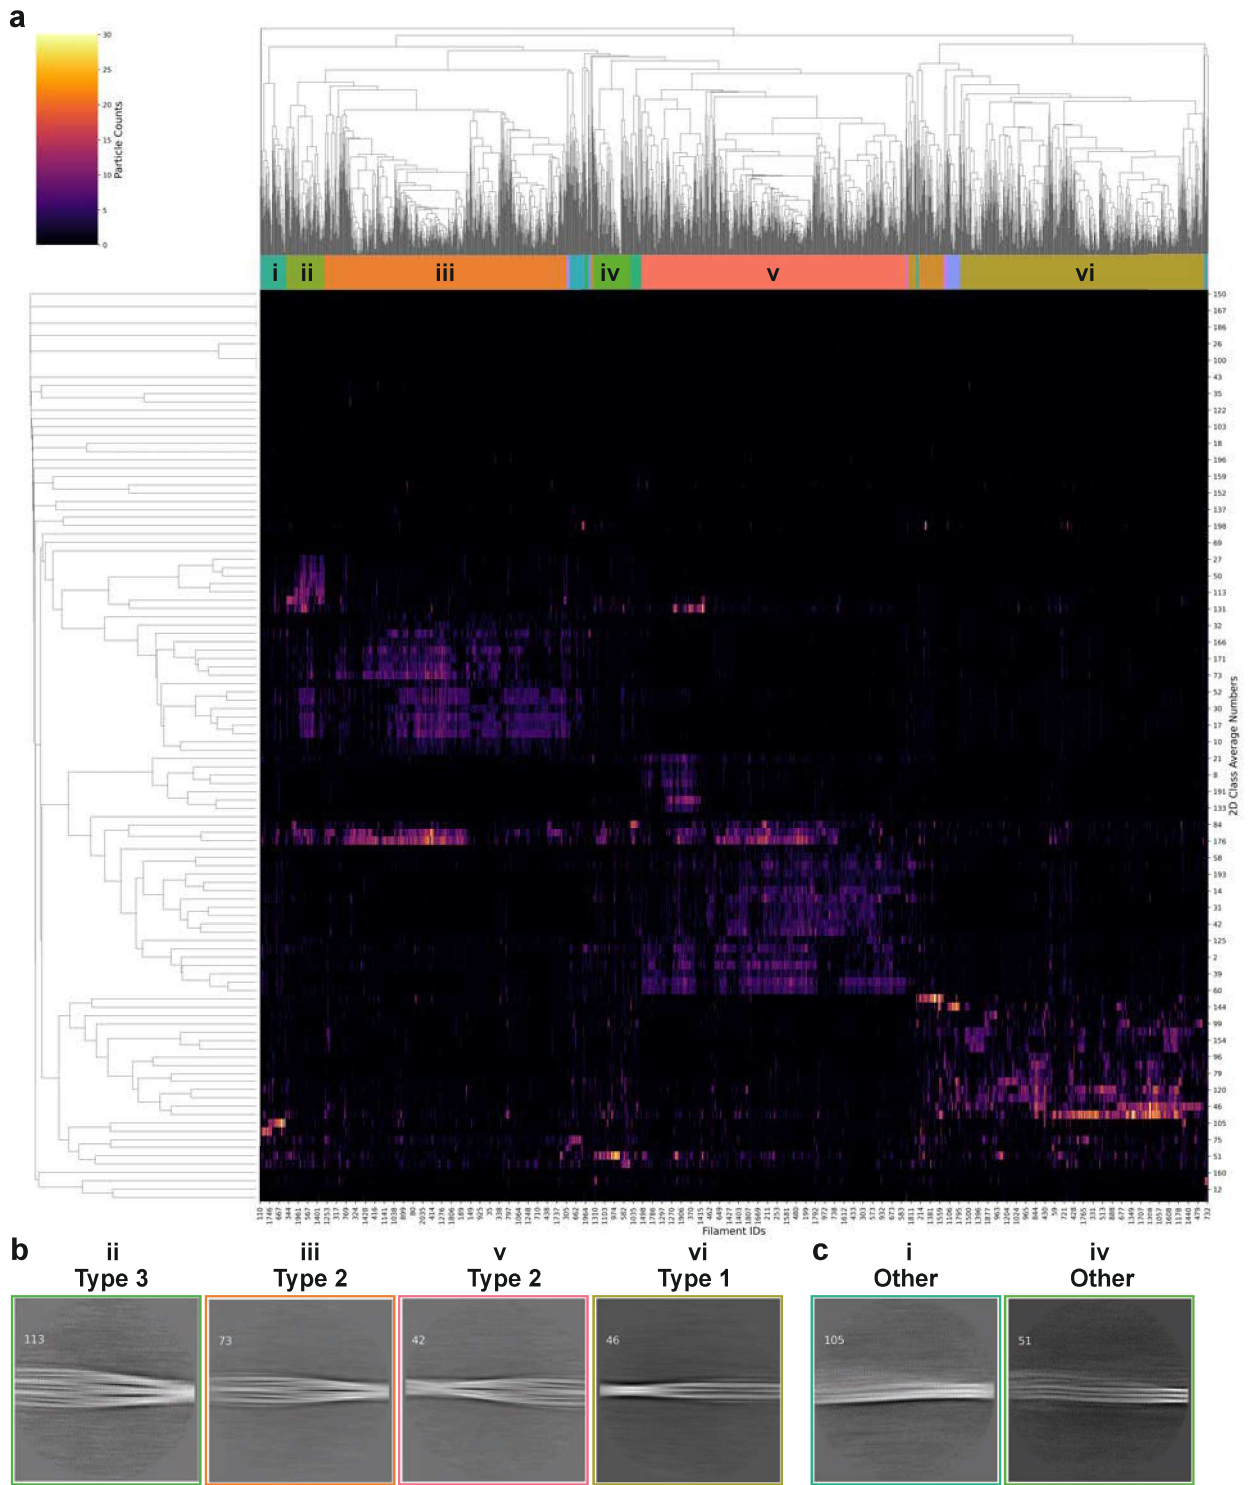

Figure S3

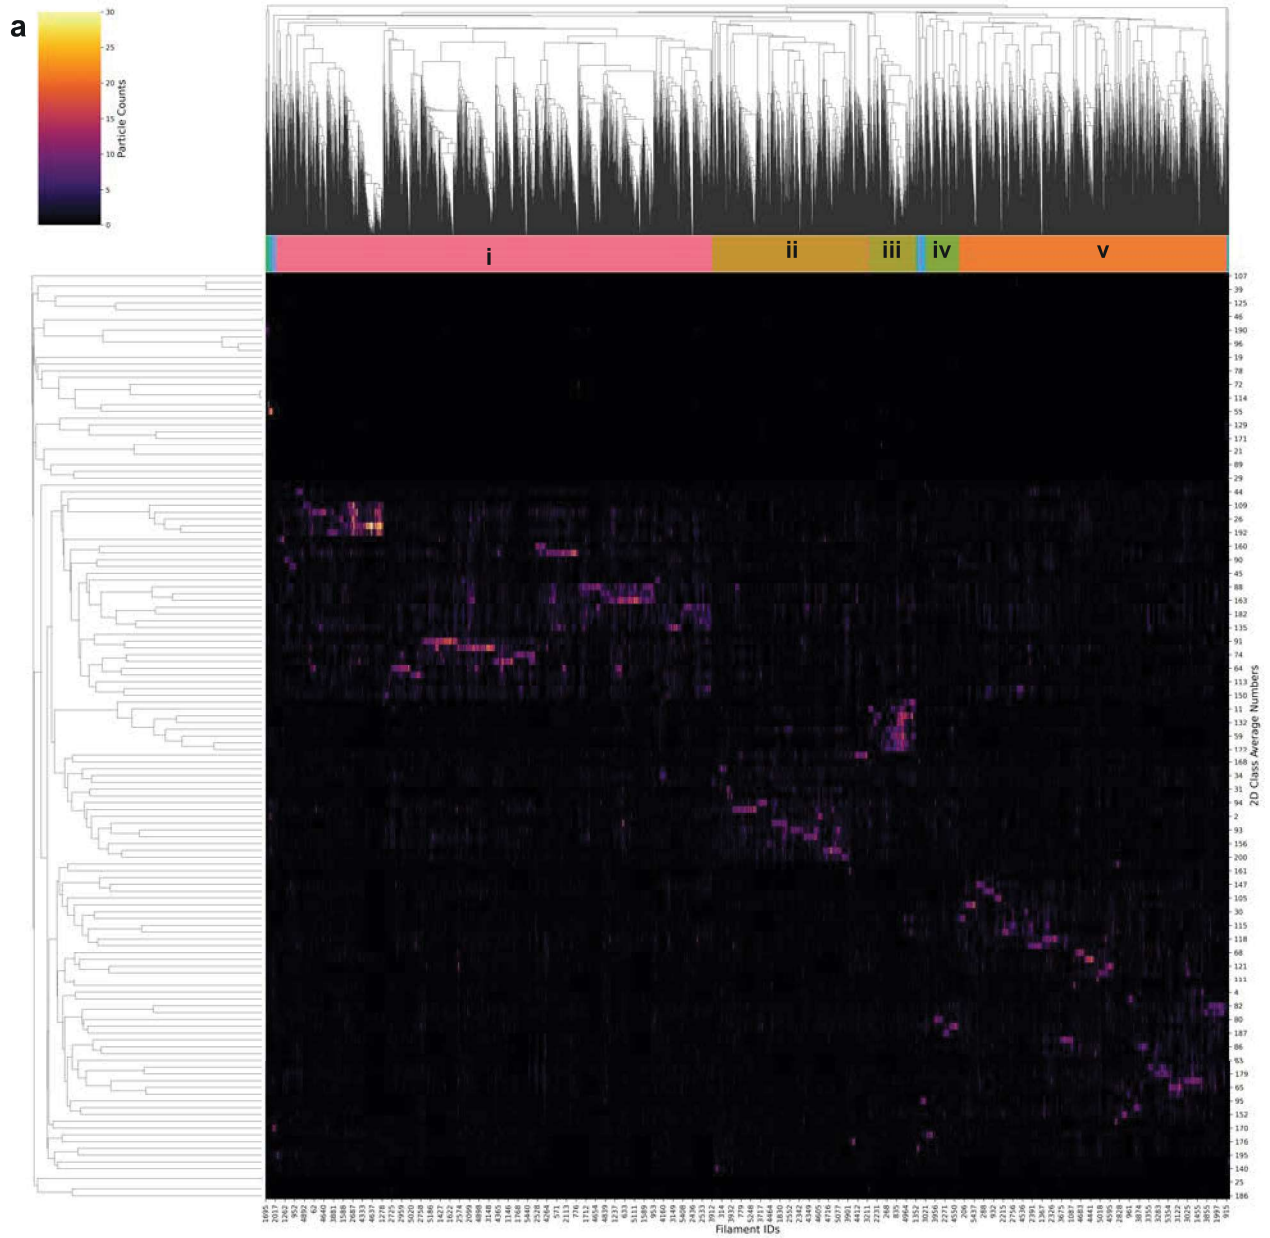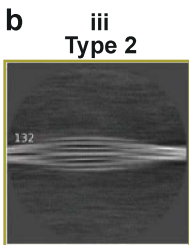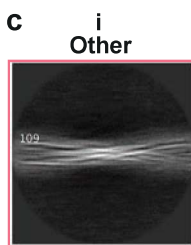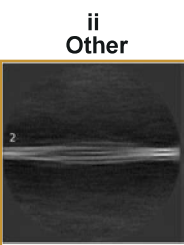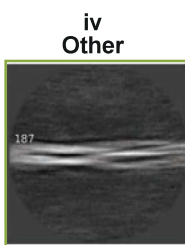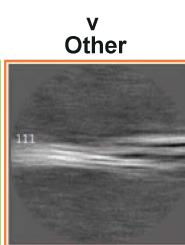

Figure S4

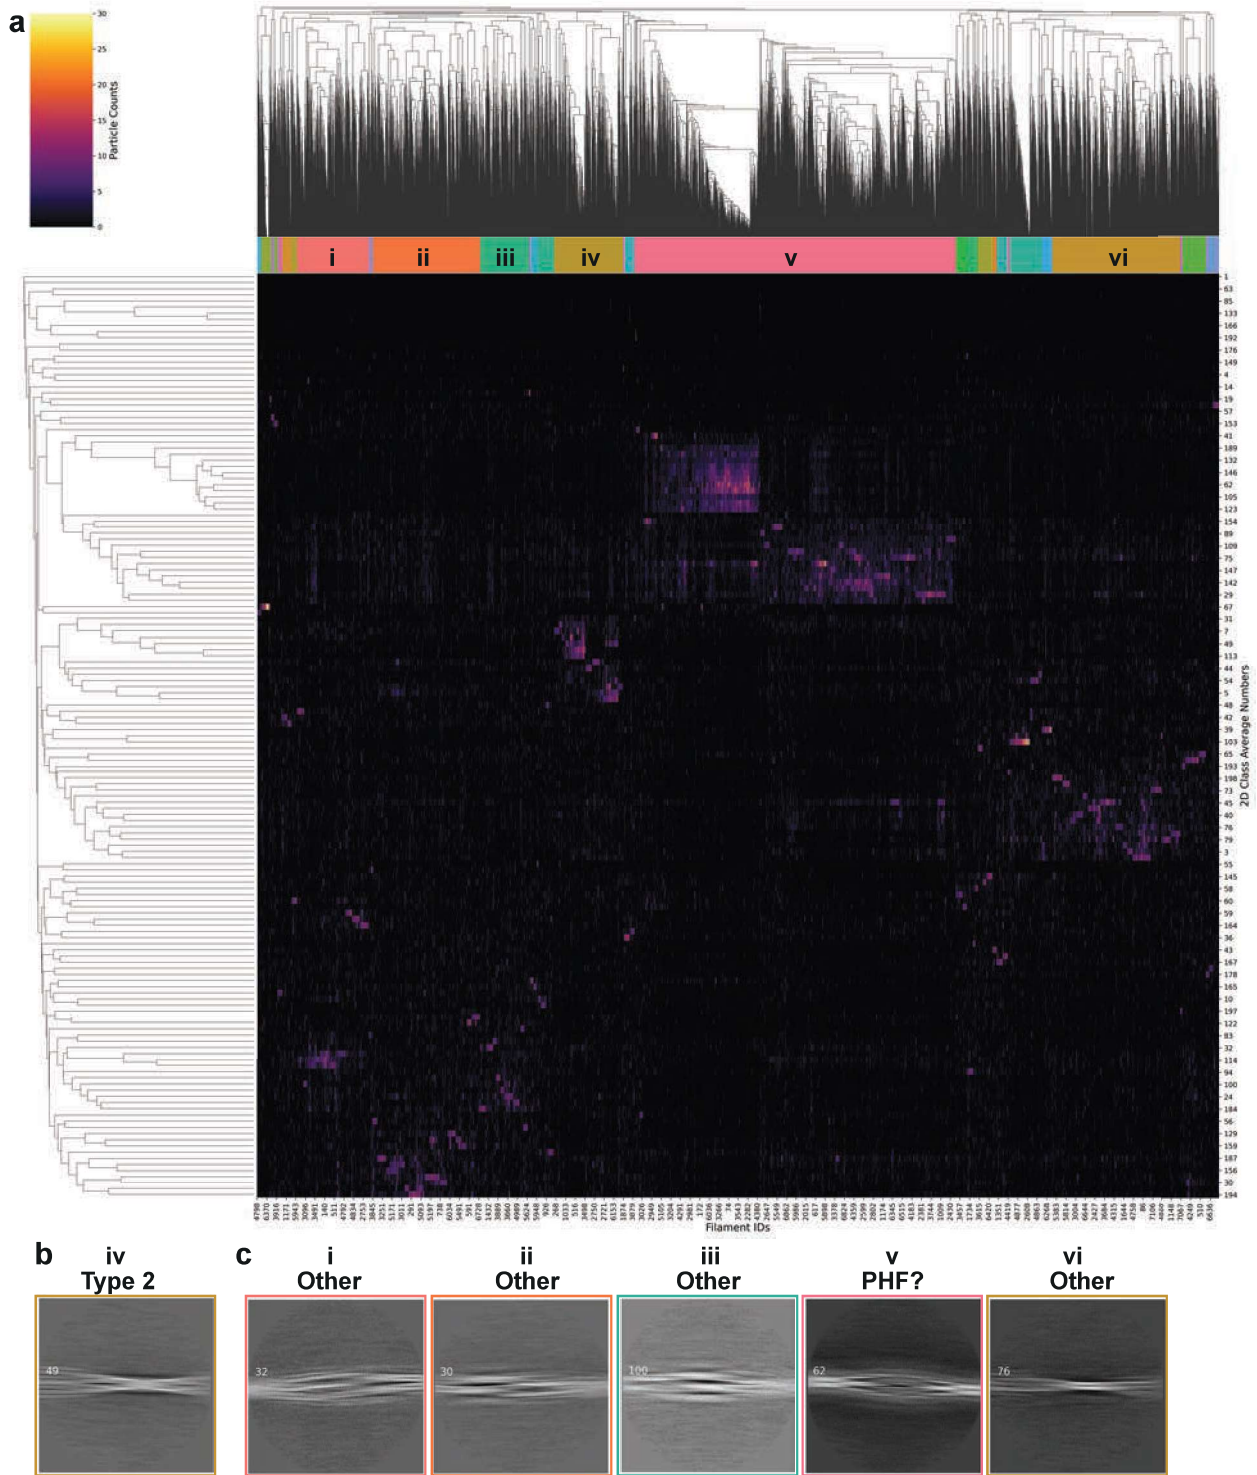

Figure S5
